# Supplementary material for: Recent Advances in Urinary Peptide and Proteomic Biomarkers in Chronic Kidney Disease: A Systematic Review
Source: Preprints.org preprint supplement (doi:10.20944/preprints202304.0319.v1), 2023-04-13
Supplement: Supplementary file 1 [file supplementary]

## Sheet: Cited
Key	Item Type	Publication Year	Author	Title	Publication Title	ISBN	ISSN	DOI	Url	Abstract Note	Date	Date Added	Date Modified	Access Date	Pages	Num Pages	Issue	Volume	Number Of Volumes	Journal Abbreviation	Short Title	Series	Series Number	Series Text	Series Title	Publisher	Place	Language	Rights	Type	Archive	Archive Location	Library Catalog	Call Number	Extra	Notes	File Attachments	Link Attachments	Manual Tags	Automatic Tags	Editor	Series Editor	Translator	Contributor	Attorney Agent	Book Author	Cast Member	Commenter	Composer
HMMK9SMI	journalArticle	2018	Pejchinovski, M.; Siwy, J.; Mullen, W.; Mischak, H.; Petri, M. A.; Burkly, L. C.; Wei, R.	Urine peptidomic biomarkers for diagnosis of patients with systematic lupus erythematosus	Lupus		1477-0962	10.1177/0961203317707827		Background Systematic lupus erythematosus (SLE) is characterized with various complications which can cause serious organ damage in the human body. Despite the significant improvements in disease management of SLE patients, the non-invasive diagnosis is entirely missing. In this study, we used urinary peptidomic biomarkers for early diagnosis of disease onset to improve patient risk stratificatio…	2018-01	2023-01-18 21:31:31	2023-01-18 21:31:31		6-16		1	27		Lupus								eng					PubMed		PMID: 28474961 PMCID: PMC6037307		C:\Users\loren\Zotero\storage\FCRXU2R8\Pejchinovski et al. - 2018 - Urine peptidomic biomarkers for diagnosis of patie.pdf;	http://www.ncbi.nlm.nih.gov/pubmed/28474961		Biomarkers; Case-Control Studies; Electrophoresis, Capillary; Humans; Lupus Erythematosus, Systemic; Mass Spectrometry; Peptides; protease prediction; Proteome; SLE; urine peptide biomarkers
KWYXLFLW	journalArticle	2021	Mavrogeorgis, Emmanouil; Mischak, Harald; Latosinska, Agnieszka; Vlahou, Antonia; Schanstra, Joost P.; Siwy, Justyna; Jankowski, Vera; Beige, Joachim; Jankowski, Joachim	Collagen-Derived Peptides in CKD: A Link to Fibrosis	Toxins		2072-6651	10.3390/toxins14010010		Collagen is a major component of the extracellular matrix (ECM) and has an imminent role in fibrosis, in, among others, chronic kidney disease (CKD). Collagen alpha-1(I) (col1a1) is the most abundant collagen type and has previously been underlined for its contribution to the disease phenotype. Here, we examined 5000 urinary peptidomic datasets randomly selected from healthy participants or patie…	2021-12-23	2023-01-18 21:31:22	2023-01-18 21:31:22		10		1	14		Toxins (Basel)	Collagen-Derived Peptides in CKD							eng					PubMed		PMID: 35050988 PMCID: PMC8781252		; C:\Users\loren\Zotero\storage\EHTZXUWS\Mavrogeorgis et al. - 2021 - Collagen-Derived Peptides in CKD A Link to Fibros.pdf	http://www.ncbi.nlm.nih.gov/pubmed/35050988		Biomarkers; CE-MS; chronic kidney disease; Collagen; collagen alpha-1(I) chain; fibrosis; Fibrosis; Peptides; Renal Insufficiency, Chronic; urine
E8MYKIF9	journalArticle	2018	Magalhães, Pedro; Pontillo, Claudia; Pejchinovski, Martin; Siwy, Justyna; Krochmal, Magdalena; Makridakis, Manousos; Carrick, Emma; Klein, Julie; Mullen, William; Jankowski, Joachim; Vlahou, Antonia; Mischak, Harald; Schanstra, Joost P.; Zürbig, Petra; Pape, Lars	Comparison of Urine and Plasma Peptidome Indicates Selectivity in Renal Peptide Handling	Proteomics. Clinical Applications		1862-8354	10.1002/prca.201700163		PURPOSE: Urine is considered to be produced predominantly as a result of plasma filtration in the kidney. However, the origin of the native peptides present in urine has never been investigated in detail. Therefore, the authors aimed to obtain a first insight into the origin of urinary peptides based on a side-by-side comprehensive analysis of the plasma and urine peptidome. METHODS: Twenty-two m…	2018-09	2023-01-18 21:31:14	2023-01-18 21:31:14		e1700163		5	12		Proteomics Clin Appl								eng					PubMed		PMID: 29611317		C:\Users\loren\Zotero\storage\7DGZRTBU\Magalhães et al. - 2018 - Comparison of Urine and Plasma Peptidome Indicates.pdf;	http://www.ncbi.nlm.nih.gov/pubmed/29611317		Chromatography, Liquid; Humans; Kidney; peptide sequencing; Peptides; peptidomics; plasma; Proteome; Proteomics; Tandem Mass Spectrometry; urine
MDRHTC5D	journalArticle	2017	Magalhães, Pedro; Pejchinovski, Martin; Markoska, Katerina; Banasik, Miroslaw; Klinger, Marian; Švec-Billá, Dominika; Rychlík, Ivan; Rroji, Merita; Restivo, Arianna; Capasso, Giovambattista; Bob, Flaviu; Schiller, Adalbert; Ortiz, Alberto; Perez-Gomez, Maria Vanessa; Cannata, Pablo; Sanchez-Niño, Maria Dolores; Naumovic, Radomir; Brkovic, Voin; Polenakovic, Momir; Mullen, William; Vlahou, Antonia…	Association of kidney fibrosis with urinary peptides: a path towards non-invasive liquid biopsies?	Scientific Reports		2045-2322	10.1038/s41598-017-17083-w		Chronic kidney disease (CKD) is a prevalent cause of morbidity and mortality worldwide. A hallmark of CKD progression is renal fibrosis characterized by excessive accumulation of extracellular matrix (ECM) proteins. In this study, we aimed to investigate the correlation of the urinary proteome classifier CKD273 and individual urinary peptides with the degree of fibrosis. In total, 42 kidney biops…	2017-12-05	2023-01-18 21:31:06	2023-01-18 21:31:06		16915		1	7		Sci Rep	Association of kidney fibrosis with urinary peptides							eng					PubMed		PMID: 29208969 PMCID: PMC5717105		; C:\Users\loren\Zotero\storage\E9AP5ARG\Magalhães et al. - 2017 - Association of kidney fibrosis with urinary peptid.pdf	http://www.ncbi.nlm.nih.gov/pubmed/29208969		Adult; Collagen; Electrophoresis, Capillary; Female; Fibrosis; Humans; Kidney; Liquid Biopsy; Male; Mass Spectrometry; Middle Aged; Peptides; Renal Insufficiency, Chronic
9UL7TBV6	journalArticle	2017	Lindhardt, Morten; Persson, Frederik; Zürbig, Petra; Stalmach, Angelique; Mischak, Harald; de Zeeuw, Dick; Lambers Heerspink, Hiddo; Klein, Ronald; Orchard, Trevor; Porta, Massimo; Fuller, John; Bilous, Rudolf; Chaturvedi, Nish; Parving, Hans-Henrik; Rossing, Peter	Urinary proteomics predict onset of microalbuminuria in normoalbuminuric type 2 diabetic patients, a sub-study of the DIRECT-Protect 2 study	Nephrology, Dialysis, Transplantation: Official Publication of the European Dialysis and Transplant Association - European Renal Association		1460-2385	10.1093/ndt/gfw292		BACKGROUND: Early prevention of diabetic nephropathy is not successful as early interventions have shown conflicting results, partly because of a lack of early and precise indicators of disease development. Urinary proteomics has shown promise in this regard and could identify those at high risk who might benefit from treatment. In this study we investigate its utility in a large type 2 diabetic …	2017-11-01	2023-01-18 21:30:58	2023-01-18 21:30:58		1866-1873		11	32		Nephrol Dial Transplant								eng					PubMed		PMID: 27507891		; C:\Users\loren\Zotero\storage\6U7B332L\Lindhardt et al. - 2017 - Urinary proteomics predict onset of microalbuminur.pdf	http://www.ncbi.nlm.nih.gov/pubmed/27507891		Aged; albuminuria; Albuminuria; Angiotensin II Type 1 Receptor Blockers; Benzimidazoles; Biomarkers; Biphenyl Compounds; Blood Pressure; clinical trial; diabetes mellitus; Diabetes Mellitus, Type 2; Diabetic Nephropathies; diabetic nephropathy; Diabetic Retinopathy; Disease Progression; Female; Glomerular Filtration Rate; Humans; Male; Middle Aged; Multicenter Studies as Topic; Proteome; proteomi…
7TUQQZBE	journalArticle	2018	Currie, Gemma E.; von Scholten, Bernt Johan; Mary, Sheon; Flores Guerrero, Jose-Luis; Lindhardt, Morten; Reinhard, Henrik; Jacobsen, Peter K.; Mullen, William; Parving, Hans-Henrik; Mischak, Harald; Rossing, Peter; Delles, Christian	Urinary proteomics for prediction of mortality in patients with type 2 diabetes and microalbuminuria	Cardiovascular Diabetology		1475-2840	10.1186/s12933-018-0697-9		BACKGROUND: The urinary proteomic classifier CKD273 has shown promise for prediction of progressive diabetic nephropathy (DN). Whether it is also a determinant of mortality and cardiovascular disease in patients with microalbuminuria (MA) is unknown. METHODS: Urine samples were obtained from 155 patients with type 2 diabetes and confirmed microalbuminuria. Proteomic analysis was undertaken using …	2018-04-06	2023-01-18 21:30:19	2023-01-18 21:30:19		50		1	17		Cardiovasc Diabetol								eng					PubMed		PMID: 29625564 PMCID: PMC5889591		; C:\Users\loren\Zotero\storage\KDAZ58YK\Currie et al. - 2018 - Urinary proteomics for prediction of mortality in .pdf	http://www.ncbi.nlm.nih.gov/pubmed/29625564		Adult; Aged; Albuminuria; Biomarkers; Cross-Sectional Studies; Diabetes; Diabetes Mellitus, Type 2; Diabetic Nephropathies; Electrophoresis, Capillary; Female; Humans; Longitudinal Studies; Male; Mass Spectrometry; Microalbuminuria; Middle Aged; Mortality; Predictive Value of Tests; Prognosis; Proteomics; Risk Factors; Time Factors; Urinalysis
RQSNHF6E	journalArticle	2019	Brunner, Hermine I.; Gulati, Gaurav; Klein-Gitelman, Marisa S.; Rouster-Stevens, Kelly A.; Tucker, Lori; Ardoin, Stacey P.; Onel, Karen B.; Mainville, Rylie; Turnier, Jessica; Aydin, Pinar Ozge Avar; Witte, David; Huang, Bin; Bennett, Michael R.; Devarajan, Prasad	Urine biomarkers of chronic kidney damage and renal functional decline in childhood-onset systemic lupus erythematosus	Pediatric Nephrology (Berlin, Germany)		1432-198X	10.1007/s00467-018-4049-5		OBJECTIVES: To delineate urine biomarkers that reflect kidney structural damage and predict renal functional decline in pediatric lupus nephritis (LN). METHODS: In this prospective study, we evaluated kidney biopsies and urine samples of 89 patients with pediatric LN. Urinary levels of 10 biomarkers [adiponectin, ceruloplasmin, kidney injury molecule-1, monocyte chemotactic protein-1, neutrophil …	2019-01	2023-01-19 09:43:59	2023-01-19 09:43:59		117-128		1	34		Pediatr Nephrol								eng					PubMed		PMID: 30159624 PMCID: PMC6294330		C:\Users\loren\Zotero\storage\9UU43DDS\Brunner et al. - 2019 - Urine biomarkers of chronic kidney damage and rena.pdf;	http://www.ncbi.nlm.nih.gov/pubmed/30159624		Adiponectin; Adolescent; Area Under Curve; Biomarker; Biomarkers; Biopsy; Child; Children; Chronicity; Damage; Disease Progression; Female; Humans; Kidney; Kidney Failure, Chronic; Kidney Function Tests; Longitudinal Studies; Lupus nephritis; Lupus Nephritis; Male; Osteopontin; Prognosis; Prospective Studies; Validation
LH5PV353	journalArticle	2019	Takei, Yoshinori; Takahashi, Shunsuke; Nakasatomi, Masao; Sakairi, Toru; Ikeuchi, Hidekazu; Kaneko, Yoriaki; Hiromura, Keiju; Nojima, Yoshihisa; Maeshima, Akito	Urinary Activin A is a novel biomarker reflecting renal inflammation and tubular damage in ANCA-associated vasculitis	PloS One		1932-6203	10.1371/journal.pone.0223703		Activin A, a member of the transforming growth factor-beta superfamily, is a critical modulator of inflammation and plays a key role in controlling the cytokine cascade that drives the inflammatory response. However, the role of activin A in inflammatory kidney diseases remains unknown. To address this issue, we examined here whether activin A can be detected in the kidney and/or urine from patie…	2019	2023-01-19 09:41:05	2023-01-19 09:41:05		e0223703		10	14		PLoS One								eng					PubMed		PMID: 31613925 PMCID: PMC6793943		; C:\Users\loren\Zotero\storage\9UN74XRL\Takei et al. - 2019 - Urinary Activin A is a novel biomarker reflecting .pdf	http://www.ncbi.nlm.nih.gov/pubmed/31613925		Activins; Aged; Anti-Neutrophil Cytoplasmic Antibody-Associated Vasculitis; Biomarkers; Biopsy; Female; Humans; Inflammation; Inhibin-beta Subunits; Kidney Tubules; Male; RNA, Messenger
W4BFBU9D	journalArticle	2017	Pérez, Vanessa; López, Dolores; Boixadera, Ester; Ibernón, Meritxell; Espinal, Anna; Bonet, Josep; Romero, Ramón	Comparative differential proteomic analysis of minimal change disease and focal segmental glomerulosclerosis	BMC nephrology		1471-2369	10.1186/s12882-017-0452-6		BACKGROUND: Minimal change disease (MCD) and primary focal segmental glomerulosclerosis (FSGS) are glomerular diseases characterized by nephrotic syndrome. Their diagnosis requires a renal biopsy, but it is an invasive procedure with potential complications. In a small biopsy sample, where only normal glomeruli are observed, FSGS cannot be differentiated from MCD. The correct diagnosis is crucial…	2017-02-03	2023-01-19 09:29:49	2023-01-19 09:29:49		49		1	18		BMC Nephrol								eng					PubMed		PMID: 28158993 PMCID: PMC5291957		; C:\Users\loren\Zotero\storage\MFNVYNVZ\Pérez et al. - 2017 - Comparative differential proteomic analysis of min.pdf	http://www.ncbi.nlm.nih.gov/pubmed/28158993		2D-DIGE; Adult; Aged; alpha 1-Antitrypsin; Biomarkers; Calbindin 2; Decision Trees; Electrophoresis, Gel, Two-Dimensional; Enzyme-Linked Immunosorbent Assay; Female; Focal segmental glomerulosclerosis; Glomerular disease; Glomerulosclerosis, Focal Segmental; Histatins; Humans; Male; Mass spectrometry; Mass Spectrometry; Middle Aged; Minimal change disease; Nephrosis, Lipoid; Proteomics; Reproduci…
BC8SYZKK	journalArticle	2018	Ling, Chen; Liu, Xiaorong; Shen, Ying; Chen, Zhi; Fan, Jianfeng; Jiang, Yeping; Meng, Qun	Urinary CD80 excretion is a predictor of good outcome in children with primary nephrotic syndrome	Pediatric Nephrology (Berlin, Germany)		1432-198X	10.1007/s00467-018-3885-7		BACKGROUND: The level of urinary cluster of differentiation 80 (uCD80) is elevated in most children with minimal change disease (MCD) as opposed to focal segmental glomerulosclerosis (FSGS) during the acute phase. The objective of this follow-up study was to evaluate whether uCD80 elevation is actually associated with MCD and whether it signals better prognosis. METHODS: We evaluated uCD80 levels…	2018-07	2023-01-19 09:29:01	2023-01-19 09:29:01		1183-1187		7	33		Pediatr Nephrol								eng					PubMed		PMID: 29569191			http://www.ncbi.nlm.nih.gov/pubmed/29569191		B7-1 Antigen; Biomarkers; CD80; Child; Child, Preschool; Children; Chronic kidney disease; Diagnosis, Differential; Disease Progression; Female; Follow-Up Studies; FSGS; Glomerular Filtration Rate; Glomerulosclerosis, Focal Segmental; Humans; Immunosuppressive Agents; Infant; Kidney; Kidney Function Tests; Male; MCD; Nephrosis, Lipoid; Nephrotic Syndrome; Predictive Value of Tests; Prognosis; Pro…
YUYS8XCU	journalArticle	2020	Gonzalez Guerrico, Anatilde M.; Lieske, John; Klee, George; Kumar, Sanjay; Lopez-Baez, Victor; Wright, Adam M.; Bobart, Shane; Shevell, Diane; Maldonado, Michael; Troost, Jonathan P.; Hogan, Marie C.; Nephrotic Syndrome Study Network Consortium (NEPTUNE)	Urinary CD80 Discriminates Among Glomerular Disease Types and Reflects Disease Activity	Kidney International Reports		2468-0249	10.1016/j.ekir.2020.08.001		INTRODUCTION: Heterogeneity of nephrotic diseases and a lack of validated biomarkers limits interventions and reduces the ability to examine outcomes. Urinary CD80 is a potential biomarker for minimal change disease (MCD) steroid-sensitive nephrotic syndrome (NS). We investigated and validated a CD80 enzyme-linked immunosorbent assay (ELISA) in urine in a large cohort with a variety of nephrotic …	2020-11	2023-01-19 09:28:37	2023-01-19 09:28:37		2021-2031		11	5		Kidney Int Rep								eng					PubMed		PMID: 33163723 PMCID: PMC7609973		; C:\Users\loren\Zotero\storage\9IYN58IM\Gonzalez Guerrico et al. - 2020 - Urinary CD80 Discriminates Among Glomerular Diseas.pdf	http://www.ncbi.nlm.nih.gov/pubmed/33163723		CD80; focal segmental glomerulosclerosis; lupus nephritis; minimial change disease; nephrotic syndrome
SBKVZM8S	journalArticle	2019	Yang, Joshua Y. C.; Sarwal, Reuben D.; Fervenza, Fernando C.; Sarwal, Minnie M.; Lafayette, Richard A.	Noninvasive Urinary Monitoring of Progression in IgA Nephropathy	International Journal of Molecular Sciences		1422-0067	10.3390/ijms20184463		Standard methods for detecting and monitoring of IgA nephropathy (IgAN) have conventionally required kidney biopsies or suffer from poor sensitivity and specificity. The Kidney Injury Test (KIT) Assay of urinary biomarkers has previously been shown to distinguish between various kidney pathologies, including chronic kidney disease, nephrolithiasis, and transplant rejection. This validation study …	2019-09-10	2023-01-19 09:24:37	2023-01-19 09:24:37		4463		18	20		Int J Mol Sci								eng					PubMed		PMID: 31510053 PMCID: PMC6770813		; C:\Users\loren\Zotero\storage\MDI857DE\Yang et al. - 2019 - Noninvasive Urinary Monitoring of Progression in I.pdf	http://www.ncbi.nlm.nih.gov/pubmed/31510053		Adrenal Cortex Hormones; Adult; Biomarkers; Creatinine; diagnostics; Disease Progression; Female; Glomerulonephritis, IGA; Humans; IgA nephropathy; Immunoglobulin A; Immunologic Factors; Kidney; Kidney Function Tests; KIT assay; KIT-IgA score; Male; Middle Aged; Monitoring, Physiologic; noninvasive; prediction; Prospective Studies; Proteinuria; Rituximab; Sensitivity and Specificity; Young Adult
7RYB3DZN	journalArticle	2022	Melchinger, Hannah; Calderon-Gutierrez, Frida; Obeid, Wassim; Xu, Leyuan; Shaw, Melissa M.; Luciano, Randy L.; Kuperman, Michael; Moeckel, Gilbert W.; Kashgarian, Michael; Wilson, F. Perry; Parikh, Chirag R.; Moledina, Dennis G.	Urine Uromodulin as a Biomarker of Kidney Tubulointerstitial Fibrosis	Clinical journal of the American Society of Nephrology: CJASN		1555-905X	10.2215/CJN.04360422		BACKGROUND AND OBJECTIVES: Uromodulin, produced exclusively in the kidney's thick ascending limb, is a biomarker of kidney tubular health. However, the relationship between urine uromodulin and histologic changes in the kidney tubulointerstitium has not been characterized. In this study, we test the association of urine uromodulin with kidney histologic findings in humans and mice. DESIGN, SETTIN…	2022-09	2023-01-19 09:21:13	2023-01-19 09:21:13		1284-1292		9	17		Clin J Am Soc Nephrol								eng					PubMed		PMID: 35948365 PMCID: PMC9625093			http://www.ncbi.nlm.nih.gov/pubmed/35948365		Albumins; Animals; Atrophy; biomarker; Biomarkers; Creatinine; cross-sectional analysis; Fibrosis; glomerulosclerosis; Humans; interstitial fibrosis; Kidney; kidney biopsy; Kidney Diseases; Mice; uromodulin; Uromodulin
S4EVK9AV	journalArticle	2022	Ou, Shuo-Ming; Tsai, Ming-Tsun; Chen, Huan-Yuan; Li, Fu-An; Lee, Kuo-Hua; Tseng, Wei-Cheng; Chang, Fu-Pang; Lin, Yao-Ping; Yang, Ruey-Bing; Tarng, Der-Cherng	Urinary Galectin-3 as a Novel Biomarker for the Prediction of Renal Fibrosis and Kidney Disease Progression	Biomedicines		2227-9059	10.3390/biomedicines10030585		Plasma galectin-3 (Gal-3) is associated with organ fibrosis, but whether urinary Gal-3 is a potential biomarker of kidney disease progression has never been explored. Between 2018 and 2021, we prospectively enrolled 280 patients who underwent renal biopsy and were divided into three groups based on their urinary Gal-3 levels (&lt;354.6, 354.6-510.7, and ≥510.8 pg/mL) to assess kidney disease prog…	2022-03-02	2023-01-19 09:20:18	2023-01-19 09:20:18		585		3	10		Biomedicines								eng					PubMed		PMID: 35327386 PMCID: PMC8945118		; C:\Users\loren\Zotero\storage\MPD4YWSQ\Ou et al. - 2022 - Urinary Galectin-3 as a Novel Biomarker for the Pr.pdf	http://www.ncbi.nlm.nih.gov/pubmed/35327386		galectin-3; kidney disease progression; renal biopsy; renal fibrosis; urinary biomarkers
88MWPHMS	journalArticle	2017	Zhou, Dong; Tian, Yuan; Sun, Ling; Zhou, Lili; Xiao, Liangxiang; Tan, Roderick J.; Tian, Jianwei; Fu, Haiyan; Hou, Fan Fan; Liu, Youhua	Matrix Metalloproteinase-7 Is a Urinary Biomarker and Pathogenic Mediator of Kidney Fibrosis	Journal of the American Society of Nephrology: JASN		1533-3450	10.1681/ASN.2016030354		Matrix metalloproteinase-7 (MMP-7), a secreted zinc- and calcium-dependent endopeptidase, is a transcriptional target of canonical Wnt/β-catenin signaling. Because Wnt/β-catenin is activated in diseased kidney, we hypothesized that urinary MMP-7 level may be used as a noninvasive surrogate biomarker for fibrotic lesions. To test this hypothesis, we conducted a cross-sectional study, measuring uri…	2017-02	2023-01-19 09:19:44	2023-01-19 09:19:44		598-611		2	28		J Am Soc Nephrol								eng					PubMed		PMID: 27624489 PMCID: PMC5280025		; C:\Users\loren\Zotero\storage\V22TBVNR\Zhou et al. - 2017 - Matrix Metalloproteinase-7 Is a Urinary Biomarker .pdf	http://www.ncbi.nlm.nih.gov/pubmed/27624489		Animals; beta Catenin; Biomarkers; chronic kidney disease; Fibrosis; Humans; Kidney; Kidney Diseases; Matrix Metalloproteinase 7; Mice; MMP-7; nephropathy; Pathophysiology of Renal Disease and Progression; renal fibrosis; Renal Insufficiency, Chronic; Wnt
3K29YZYA	journalArticle	2018	Rodríguez-Ortiz, María E.; Pontillo, Claudia; Rodríguez, Mariano; Zürbig, Petra; Mischak, Harald; Ortiz, Alberto	Novel Urinary Biomarkers For Improved Prediction Of Progressive Egfr Loss In Early Chronic Kidney Disease Stages And In High Risk Individuals Without Chronic Kidney Disease	Scientific Reports		2045-2322	10.1038/s41598-018-34386-8		Chronic kidney disease is associated with increased risk of CKD progression and death. Therapeutic approaches to limit progression are limited. Developing tools for the early identification of those individuals most likely to progress will allow enriching clinical trials in high risk early CKD patients. The CKD273 classifier is a panel of 273 urinary peptides that enables early detection of CKD a…	2018-10-29	2023-01-19 09:15:29	2023-01-19 09:15:29		15940		1	8		Sci Rep								eng					PubMed		PMID: 30374033 PMCID: PMC6206033		; C:\Users\loren\Zotero\storage\QVI3NLZ4\Rodríguez-Ortiz et al. - 2018 - Novel Urinary Biomarkers For Improved Prediction O.pdf	http://www.ncbi.nlm.nih.gov/pubmed/30374033		Adult; Aged; Albuminuria; Area Under Curve; Biomarkers; Disease Progression; Early Diagnosis; Female; Glomerular Filtration Rate; Humans; Male; Middle Aged; Peptides; Prognosis; Renal Insufficiency, Chronic; Risk Factors; ROC Curve; Support Vector Machine
C3J3VF3N	journalArticle	2021	Sánchez-Álamo, Beatriz; García-Iñigo, Francisco José; Shabaka, Amir; Acedo, Juan Manuel; Cases-Corona, Clara; Domínguez-Torres, Patricia; Diaz-Enamorado, Yunayka; Landaluce, Eugenia; Navarro-González, Juan F.; Gorriz, José Luis; Martínez-Castelao, Alberto; Fernández-Juárez, Gema	Urinary Dickkopf-3: a new biomarker for CKD progression and mortality	Nephrology, Dialysis, Transplantation: Official Publication of the European Dialysis and Transplant Association - European Renal Association		1460-2385	10.1093/ndt/gfab198		BACKGROUND: Kidney fibrosis has been reported to be a prognostic factor in chronic kidney disease (CKD) progression. Previous studies have shown that the assessment of urinary Dickkopf-3 (uDKK3), a stress-induced tubular epithelial-derived profibrotic glycoprotein, might be a potential tubulointerstitial fibrosis biomarker and might identify patients at short-term risk of glomerular filtration ra…	2021-12-02	2023-01-19 09:13:49	2023-01-19 09:13:49		2199-2207		12	36		Nephrol Dial Transplant	Urinary Dickkopf-3							eng					PubMed		PMID: 34145894		; C:\Users\loren\Zotero\storage\GD5SMUV6\Sánchez-Álamo et al. - 2021 - Urinary Dickkopf-3 a new biomarker for CKD progre.pdf	http://www.ncbi.nlm.nih.gov/pubmed/34145894		Biomarkers; chronic kidney disease (CKD) progression; Creatinine; Disease Progression; fibrosis; Glomerular Filtration Rate; Humans; Progreser; Pronedi; Renal Insufficiency, Chronic; Renin-Angiotensin System; renin–angiotensin–aldosterone system (RAAS) blockade; urinary Dickkopf-3 (uDKK3)
2QMB2UEV	journalArticle	2020	Tofte, Nete; Lindhardt, Morten; Adamova, Katarina; Bakker, Stephan J. L.; Beige, Joachim; Beulens, Joline W. J.; Birkenfeld, Andreas L.; Currie, Gemma; Delles, Christian; Dimos, Ingo; Francová, Lidmila; Frimodt-Møller, Marie; Girman, Peter; Göke, Rüdiger; Havrdova, Tereza; Heerspink, Hiddo J. L.; Kooy, Adriaan; Laverman, Gozewijn D.; Mischak, Harald; Navis, Gerjan; Nijpels, Giel; Noutsou, Marina;…	Early detection of diabetic kidney disease by urinary proteomics and subsequent intervention with spironolactone to delay progression (PRIORITY): a prospective observational study and embedded randomised placebo-controlled trial	The Lancet. Diabetes & Endocrinology		2213-8595	10.1016/S2213-8587(20)30026-7		BACKGROUND: Microalbuminuria is an early sign of kidney disease in people with diabetes and indicates increased risk of cardiovascular disease. We tested whether a urinary proteomic risk classifier (CKD273) score was associated with development of microalbuminuria and whether progression to microalbuminuria could be prevented with the mineralocorticoid receptor antagonist spironolactone. METHODS:…	2020-04	2023-01-19 08:54:12	2023-01-19 08:54:12		301-312		4	8		Lancet Diabetes Endocrinol	Early detection of diabetic kidney disease by urinary proteomics and subsequent intervention with spironolactone to delay progression (PRIORITY)							eng					PubMed		PMID: 32135136		; C:\Users\loren\Zotero\storage\7GWVJZVA\Tofte et al. - 2020 - Early detection of diabetic kidney disease by urin.pdf	http://www.ncbi.nlm.nih.gov/pubmed/32135136		Adult; Aged; Albuminuria; Diabetes Mellitus, Type 2; Diabetic Nephropathies; Disease Progression; Early Diagnosis; Female; Glomerular Filtration Rate; Humans; Male; Middle Aged; Mineralocorticoid Receptor Antagonists; Prospective Studies; Proteomics; Spironolactone; Treatment Outcome
7FFYBR3Y	journalArticle	2021	Catanese, Lorenzo; Siwy, Justyna; Mavrogeorgis, Emmanouil; Amann, Kerstin; Mischak, Harald; Beige, Joachim; Rupprecht, Harald	A Novel Urinary Proteomics Classifier for Non-Invasive Evaluation of Interstitial Fibrosis and Tubular Atrophy in Chronic Kidney Disease	Proteomes		2227-7382	10.3390/proteomes9030032		Non-invasive urinary peptide biomarkers are able to detect and predict chronic kidney disease (CKD). Moreover, specific urinary peptides enable discrimination of different CKD etiologies and offer an interesting alternative to invasive kidney biopsy, which cannot always be performed. The aim of this study was to define a urinary peptide classifier using mass spectrometry technology to predict the…	2021-07-13	2023-01-19 08:53:55	2023-01-19 08:53:55		32		3	9		Proteomes								eng					PubMed		PMID: 34287333 PMCID: PMC8293473		; C:\Users\loren\Zotero\storage\FL67JQX6\Catanese et al. - 2021 - A Novel Urinary Proteomics Classifier for Non-Inva.pdf	http://www.ncbi.nlm.nih.gov/pubmed/34287333		biomarkers; fibrosis; IFTA; peptides; urine
IWC2ZY3J	journalArticle	2021	Wendt, Ralph; Siwy, Justyna; He, Tianlin; Latosinska, Agnieszka; Wiech, Thorsten; Zipfel, Peter F.; Tserga, Aggeliki; Vlahou, Antonia; Rupprecht, Harald; Catanese, Lorenzo; Mischak, Harald; Beige, Joachim	Molecular Mapping of Urinary Complement Peptides in Kidney Diseases	Proteomes		2227-7382	10.3390/proteomes9040049		Defective complement activation has been associated with various types of kidney disease. This led to the hypothesis that specific urine complement fragments may be associated with kidney disease etiologies, and disease progression may be reflected by changes in these complement fragments. We investigated the occurrence of complement fragments in urine, their association with kidney function and …	2021-12-13	2023-01-19 08:53:36	2023-01-19 08:53:36		49		4	9		Proteomes								eng					PubMed		PMID: 34941814 PMCID: PMC8709096		; C:\Users\loren\Zotero\storage\RKTYZFK8\Wendt et al. - 2021 - Molecular Mapping of Urinary Complement Peptides i.pdf	http://www.ncbi.nlm.nih.gov/pubmed/34941814		biomarker; capillary electrophoresis; CE-MS; complement; kidney disease; peptide; proteomics; urine
G6BPI5X7	journalArticle	2021	Rudnicki, Michael; Siwy, Justyna; Wendt, Ralph; Lipphardt, Mark; Koziolek, Michael J.; Maixnerova, Dita; Peters, Björn; Kerschbaum, Julia; Leierer, Johannes; Neprasova, Michaela; Banasik, Miroslaw; Sanz, Ana Belen; Perez-Gomez, Maria Vanessa; Ortiz, Alberto; Stegmayr, Bernd; Tesar, Vladimir; Mischak, Harald; Beige, Joachim; Reich, Heather N.; PERSTIGAN working group	Urine proteomics for prediction of disease progression in patients with IgA nephropathy	Nephrology, Dialysis, Transplantation: Official Publication of the European Dialysis and Transplant Association - European Renal Association		1460-2385	10.1093/ndt/gfaa307		BACKGROUND: Risk of kidney function decline in immunoglobulin A (IgA) nephropathy (IgAN) is significant and may not be predicted by available clinical and histological tools. To serve this unmet need, we aimed at developing a urinary biomarker-based algorithm that predicts rapid disease progression in IgAN, thus enabling a personalized risk stratification. METHODS: In this multicentre study, urin…	2021-12-31	2023-01-19 08:53:10	2023-01-19 08:53:10		42-52		1	37		Nephrol Dial Transplant								eng					PubMed		PMID: 33313853 PMCID: PMC8719618		; C:\Users\loren\Zotero\storage\TA4PEC56\Rudnicki et al. - 2021 - Urine proteomics for prediction of disease progres.pdf	http://www.ncbi.nlm.nih.gov/pubmed/33313853		Adult; biomarker; Disease Progression; Glomerular Filtration Rate; glomerulonephritis; Glomerulonephritis, IGA; Humans; IgAN; Male; progression; Proteinuria; Proteomics; urine proteomics
AZF8N9YT	journalArticle	2017	Pejchinovski, Martin; Siwy, Justyna; Metzger, Jochen; Dakna, Mohammed; Mischak, Harald; Klein, Julie; Jankowski, Vera; Bae, Kyongtae T.; Chapman, Arlene B.; Kistler, Andreas D.	Urine peptidome analysis predicts risk of end-stage renal disease and reveals proteolytic pathways involved in autosomal dominant polycystic kidney disease progression	Nephrology, Dialysis, Transplantation: Official Publication of the European Dialysis and Transplant Association - European Renal Association		1460-2385	10.1093/ndt/gfw243		BACKGROUND: Autosomal dominant polycystic kidney disease (ADPKD) is characterized by slowly progressive bilateral renal cyst growth ultimately resulting in loss of kidney function and end-stage renal disease (ESRD). Disease progression rate and age at ESRD are highly variable. Therapeutic interventions therefore require early risk stratification of patients and monitoring of disease progression i…	2017-03-01	2023-01-19 08:52:43	2023-01-19 08:52:43		487-497		3	32		Nephrol Dial Transplant								eng					PubMed		PMID: 27382111		; C:\Users\loren\Zotero\storage\RFKSLBXE\Pejchinovski et al. - 2017 - Urine peptidome analysis predicts risk of end-stag.pdf	http://www.ncbi.nlm.nih.gov/pubmed/27382111		Adolescent; ADPKD; Adult; Biomarkers; Disease Progression; Electrophoresis, Capillary; ESRD; Female; Follow-Up Studies; Glomerular Filtration Rate; Humans; Kidney Failure, Chronic; Male; Mass Spectrometry; Middle Aged; Peptides; Polycystic Kidney, Autosomal Dominant; progression; proteases prediction; Risk; Urinalysis; urinary peptides; Young Adult
QCX5JDI2	journalArticle	2018	Lindhardt, Morten; Persson, Frederik; Oxlund, Christina; Jacobsen, Ib A.; Zürbig, Petra; Mischak, Harald; Rossing, Peter; Heerspink, Hiddo J. L.	Predicting albuminuria response to spironolactone treatment with urinary proteomics in patients with type 2 diabetes and hypertension	Nephrology, Dialysis, Transplantation: Official Publication of the European Dialysis and Transplant Association - European Renal Association		1460-2385	10.1093/ndt/gfw406		BACKGROUND: The mineralocorticoid receptor antagonist spironolactone significantly reduces albuminuria in patients with diabetes. Prior studies have shown large between-patient variability in albuminuria treatment response. We previously developed and validated a urinary proteomic classifier that predicts onset and progression of chronic kidney disease. Here, we tested whether the proteomic class…	2018-02-01	2023-01-19 08:52:26	2023-01-19 08:52:26		296-303		2	33		Nephrol Dial Transplant								eng					PubMed		PMID: 28064163		; C:\Users\loren\Zotero\storage\IT9FP2YG\Lindhardt et al. - 2018 - Predicting albuminuria response to spironolactone .pdf	http://www.ncbi.nlm.nih.gov/pubmed/28064163		Adolescent; Adult; Aged; Albuminuria; diabetes mellitus type II; Diabetes Mellitus, Type 2; Double-Blind Method; Female; Humans; hypertension; Hypertension; Male; Middle Aged; mineralocorticoid receptor antagonists; Mineralocorticoid Receptor Antagonists; precision medicine; Proteome; proteomics; Renin-Angiotensin System; Spironolactone; Urinalysis; Young Adult
WH7ZBV6A	journalArticle	2019	Zürbig, Petra; Mischak, Harald; Menne, Jan; Haller, Hermann	CKD273 Enables Efficient Prediction of Diabetic Nephropathy in Nonalbuminuric Patients	Diabetes Care		1935-5548	10.2337/dc18-1322			2019-01	2023-01-19 08:52:11	2023-01-19 08:52:11		e4-e5		1	42		Diabetes Care								eng					PubMed		PMID: 30455331		; C:\Users\loren\Zotero\storage\KBKJG8PG\Zürbig et al. - 2019 - CKD273 Enables Efficient Prediction of Diabetic Ne.pdf	http://www.ncbi.nlm.nih.gov/pubmed/30455331
EECXSSG8	journalArticle	2021	Puthumana, Jeremy; Thiessen-Philbrook, Heather; Xu, Leyuan; Coca, Steven G.; Garg, Amit X.; Himmelfarb, Jonathan; Bhatraju, Pavan K.; Ikizler, T. Alp; Siew, Edward D.; Ware, Lorraine B.; Liu, Kathleen D.; Go, Alan S.; Kaufman, James S.; Kimmel, Paul L.; Chinchilli, Vernon M.; Cantley, Lloyd G.; Parikh, Chirag R.	Biomarkers of inflammation and repair in kidney disease progression	The Journal of Clinical Investigation		1558-8238	10.1172/JCI139927		INTRODUCTIONAcute kidney injury and chronic kidney disease (CKD) are common in hospitalized patients. To inform clinical decision making, more accurate information regarding risk of long-term progression to kidney failure is required.METHODSWe enrolled 1538 hospitalized patients in a multicenter, prospective cohort study. Monocyte chemoattractant protein 1 (MCP-1/CCL2), uromodulin (UMOD), and YKL…	2021-02-01	2023-01-19 08:51:28	2023-01-19 08:51:28		e139927, 139927		3	131		J Clin Invest								eng					PubMed		PMID: 33290282 PMCID: PMC7843225		; C:\Users\loren\Zotero\storage\9Y5S7WTL\Puthumana et al. - 2021 - Biomarkers of inflammation and repair in kidney di.pdf	http://www.ncbi.nlm.nih.gov/pubmed/33290282		Acute Kidney Injury; Aged; Animals; Biomarkers; Chemokine CCL2; Chitinase-3-Like Protein 1; Chronic kidney disease; Clinical practice; Disease Models, Animal; Disease Progression; Female; Follow-Up Studies; Glomerular Filtration Rate; Humans; Inflammation; Male; Mice; Middle Aged; Molecular diagnosis; Nephrology; Renal Insufficiency, Chronic
88W4XYXV	journalArticle	2021	Wörn, Matthias; Bohnert, Bernhard N.; Alenazi, Fawza; Boldt, Karsten; Klose, Franziska; Junger, Katrin; Ueffing, Marius; Birkenfeld, Andreas L.; Kalbacher, Hubert; Artunc, Ferruh	Proteasuria in nephrotic syndrome-quantification and proteomic profiling	Journal of Proteomics		1876-7737	10.1016/j.jprot.2020.103981		Nephrotic syndrome is characterized by urinary excretion of plasma proteases or proteasuria. There is a lack of data on the quantity, activity status and identity of these aberrantly filtered proteases. We established a fluorescence-based substrate assay to quantify protease activity in urine samples from healthy and nephrotic humans and mice. Protease class activity was determined after addition…	2021-01-06	2023-01-19 08:51:23	2023-01-19 08:51:23		103981			230		J Proteomics								eng					PubMed		PMID: 32927112			http://www.ncbi.nlm.nih.gov/pubmed/32927112		Animals; Humans; Mice; Nephrotic syndrome; Nephrotic Syndrome; Protease activity; Proteases; Proteasuria; Proteinuria; Proteomics; Serine Proteases; Serine Proteinase Inhibitors; Tandem Mass Spectrometry
UILNQIKU	journalArticle	2021	Menez, Steven; Ju, Wenjun; Menon, Rajasree; Moledina, Dennis G.; Thiessen Philbrook, Heather; McArthur, Eric; Jia, Yaqi; Obeid, Wassim; Mansour, Sherry G.; Koyner, Jay L.; Shlipak, Michael G.; Coca, Steven G.; Garg, Amit X.; Bomback, Andrew S.; Kellum, John A.; Kretzler, Matthias; Parikh, Chirag R.; Translational Research Investigating Biomarker Endpoints in AKI (TRIBE-AKI) Consortium and the Kid…	Urinary EGF and MCP-1 and risk of CKD after cardiac surgery	JCI insight		2379-3708	10.1172/jci.insight.147464		BACKGROUNDAssessment of chronic kidney disease (CKD) risk after acute kidney injury (AKI) is based on limited markers primarily reflecting glomerular function. We evaluated markers of cell integrity (EGF) and inflammation (monocyte chemoattractant protein-1, MCP-1) for predicting long-term kidney outcomes after cardiac surgery.METHODSWe measured EGF and MCP-1 in postoperative urine samples from 8…	2021-06-08	2023-01-19 08:51:17	2023-01-19 08:51:17		e147464, 147464		11	6		JCI Insight								eng					PubMed		PMID: 33974569 PMCID: PMC8262289		; C:\Users\loren\Zotero\storage\HQSQ4GC5\Menez et al. - 2021 - Urinary EGF and MCP-1 and risk of CKD after cardia.pdf	http://www.ncbi.nlm.nih.gov/pubmed/33974569		Acute Kidney Injury; Aged; Aged, 80 and over; Cardiac Surgical Procedures; Cardiovascular disease; Chemokine CCL2; Chronic kidney disease; Disease Progression; Epidermal Growth Factor; Female; Gene Expression Profiling; Humans; Incidence; Male; Molecular genetics; Nephrology; Postoperative Complications; Proportional Hazards Models; Renal Insufficiency, Chronic; RNA-Seq; RNA, Messenger; Single-Ce…
MA88DR2K	journalArticle	2021	Davies, Jennifer C.; Carlsson, Emil; Midgley, Angela; Smith, Eve M. D.; Bruce, Ian N.; Beresford, Michael W.; Hedrich, Christian M.; BILAG-BR and MRC MASTERPLANS Consortia	A panel of urinary proteins predicts active lupus nephritis and response to rituximab treatment	Rheumatology (Oxford, England)		1462-0332	10.1093/rheumatology/keaa851		OBJECTIVES: ∼30% of patients with SLE develop LN. Presence and/or severity of LN are currently assessed by renal biopsy, but biomarkers in serum or urine samples may provide an avenue for non-invasive routine testing. We aimed to validate a urinary protein panel for its ability to predict active renal involvement in SLE. METHODS: A total of 197 SLE patients and 48 healthy controls were recruited,…	2021-08-02	2023-01-19 08:51:03	2023-01-19 08:51:03		3747-3759		8	60		Rheumatology (Oxford)								eng					PubMed		PMID: 33313921 PMCID: PMC8328509		; C:\Users\loren\Zotero\storage\AY4JW82R\Davies et al. - 2021 - A panel of urinary proteins predicts active lupus .pdf	http://www.ncbi.nlm.nih.gov/pubmed/33313921		Adult; Antirheumatic Agents; biomarker; Ceruloplasmin; Chemokine CCL2; Female; Humans; inflammation; Intramolecular Oxidoreductases; Lipocalins; Logistic Models; Lupus Erythematosus, Systemic; lupus nephritis; Lupus Nephritis; Male; Middle Aged; Orosomucoid; Prognosis; renal; rituximab; Rituximab; SLE; stratification; Transferrin; treatment; Treatment Outcome; Vascular Cell Adhesion Molecule-1
KE3IFX9I	journalArticle	2021	Perez-Gomez, Maria Vanessa; Pizarro-Sanchez, Soledad; Gracia-Iguacel, Carolina; Cano, Santiago; Cannata-Ortiz, Pablo; Sanchez-Rodriguez, Jinny; Sanz, Ana Belen; Sanchez-Niño, Maria Dolores; Ortiz, Alberto	Urinary Growth Differentiation Factor-15 (GDF15) levels as a biomarker of adverse outcomes and biopsy findings in chronic kidney disease	Journal of Nephrology		1724-6059	10.1007/s40620-021-01020-2		BACKGROUND: Growth Differentiation Factor-15 (GDF15) is a member of the TGF-β superfamily. Increased serum GDF15 has been associated with increased risk of chronic kidney disease (CKD) progression. However, no prior studies have addressed the significance of urinary GDF15 in adult CKD. METHODS: We measured serum and urinary GDF15 in a prospective cohort of 84 patients who underwent kidney biopsy …	2021-12	2023-01-19 08:50:58	2023-01-19 08:50:58		1819-1832		6	34		J Nephrol								eng					PubMed		PMID: 33847920			http://www.ncbi.nlm.nih.gov/pubmed/33847920		Biomarker; Biomarkers; Biopsy; Chronic kidney disease; Diabetic nephropathy; GDF15; Glomerular Filtration Rate; Growth Differentiation Factor 15; Humans; Kidney biopsy; Prospective Studies; Renal Insufficiency, Chronic
W3F3J2G6	journalArticle	2021	Norvik, Jon Viljar; Harskamp, Laura R.; Nair, Viji; Shedden, Kerby; Solbu, Marit D.; Eriksen, Bjørn O.; Kretzler, Matthias; Gansevoort, Ron T.; Ju, Wenjun; Melsom, Toralf	Urinary excretion of epidermal growth factor and rapid loss of kidney function	Nephrology, Dialysis, Transplantation: Official Publication of the European Dialysis and Transplant Association - European Renal Association		1460-2385	10.1093/ndt/gfaa208		BACKGROUND: Lower urinary excretion of the kidney tubule-specific biomarker epidermal growth factor (uEGF) is associated with increased risk of renal function [glomerular filtration rate (GFR)] loss in diabetes and in patients with established chronic kidney disease (CKD). We investigated whether uEGF is associated with rapid GFR decline or incident CKD in the general population. METHODS: Subject…	2021-09-27	2023-01-19 08:50:49	2023-01-19 08:50:49		1882-1892		10	36		Nephrol Dial Transplant								eng					PubMed		PMID: 33068410 PMCID: PMC8633454		; C:\Users\loren\Zotero\storage\N3BM6Y47\Norvik et al. - 2021 - Urinary excretion of epidermal growth factor and r.pdf	http://www.ncbi.nlm.nih.gov/pubmed/33068410		chronic kidney disease; clinical epidemiology; Creatinine; Disease Progression; epidermal growth factor; Epidermal Growth Factor; Glomerular Filtration Rate; Humans; Kidney; Netherlands; Norway; renal function decline; Renal Insufficiency, Chronic; uEGF
MFCZDXQM	journalArticle	2021	Seibert, Felix S.; Heringhaus, Anja; Pagonas, Nikolaos; Rohn, Benjamin; Bauer, Frederic; Trappe, Hans-Joachim; Landmesser, Ulf; Babel, Nina; Westhoff, Timm H.	Dickkopf-3 in the prediction of contrast media induced acute kidney injury	Journal of Nephrology		1724-6059	10.1007/s40620-020-00910-1		BACKGROUND: Dickkopf-3 (DKK3) has recently been discovered as a urinary biomarker for the prediction of acute kidney injury (AKI) after cardiac surgery. This finding needs to be confirmed for AKI in other clinical settings. The present study investigates whether DKK3 can predict contrast-induced AKI (CI-AKI). METHODS: We performed a prospective study in 490 patients undergoing coronary angiograph…	2021-06	2023-01-19 08:50:37	2023-01-19 08:50:37		821-828		3	34		J Nephrol								eng					PubMed		PMID: 33275197 PMCID: PMC8192364		; C:\Users\loren\Zotero\storage\DMTTERNL\Seibert et al. - 2021 - Dickkopf-3 in the prediction of contrast media ind.pdf	http://www.ncbi.nlm.nih.gov/pubmed/33275197		Acute Kidney Injury; Adaptor Proteins, Signal Transducing; Aged; Biomarkers; CI-AKI; Contrast Media; Contrast media induced acute kidney injury; Coronary angiography; Coronary Angiography; Creatinine; Dickkopf-3; Female; Humans; Male; Middle Aged; Predictive Value of Tests; Prospective Studies; Tubular toxicity
CK94Z567	journalArticle	2021	Mejia-Vilet, Juan M.; Shapiro, John P.; Zhang, Xiaolan L.; Cruz, Cristino; Zimmerman, Grant; Méndez-Pérez, R. Angélica; Cano-Verduzco, Mayra L.; Parikh, Samir V.; Nagaraja, Haikady N.; Morales-Buenrostro, Luis E.; Rovin, Brad H.	Association Between Urinary Epidermal Growth Factor and Renal Prognosis in Lupus Nephritis	Arthritis & Rheumatology (Hoboken, N.J.)		2326-5205	10.1002/art.41507		OBJECTIVE: To evaluate the role of urinary epidermal growth factor (EGF) as a biomarker of chronic kidney damage in lupus nephritis (LN). METHODS: A proteomics approach was used to identify urinary EGF as a biomarker of interest in a discovery cohort of patients with LN. The expression of urinary EGF was characterized in 2 large multiethnic LN cohorts, and the association between urinary EGF leve…	2021-02	2023-01-19 08:50:33	2023-01-19 08:50:33		244-254		2	73		Arthritis Rheumatol								eng					PubMed		PMID: 32892508			http://www.ncbi.nlm.nih.gov/pubmed/32892508		Adult; Blotting, Western; Case-Control Studies; Cohort Studies; Cross-Sectional Studies; Disease Progression; Enzyme-Linked Immunosorbent Assay; Epidermal Growth Factor; Female; Humans; Longitudinal Studies; Lupus Nephritis; Male; Middle Aged; Prognosis; Proteomics; Renal Insufficiency, Chronic; Symptom Flare Up
UZJU3FD7	journalArticle	2021	Lee, Yu Ho; Kim, Ki Pyo; Park, Sun-Hwa; Kim, Dong-Jin; Kim, Yang-Gyun; Moon, Ju-Young; Jung, Su-Woong; Kim, Jin Sug; Jeong, Kyung-Hwan; Lee, So-Young; Yang, Dong-Ho; Lim, Sung-Jig; Woo, Jeong-Taek; Rhee, Sang Youl; Chon, Suk; Choi, Hoon-Young; Park, Hyeong-Cheon; Jo, Young-Il; Yi, Joo-Hark; Han, Sang-Woong; Lee, Sang-Ho	Urinary chemokine C-X-C motif ligand 16 and endostatin as predictors of tubulointerstitial fibrosis in patients with advanced diabetic kidney disease	Nephrology, Dialysis, Transplantation: Official Publication of the European Dialysis and Transplant Association - European Renal Association		1460-2385	10.1093/ndt/gfz168		BACKGROUND: Interstitial fibrosis and tubular atrophy (IFTA) is a well-recognized risk factor for poor renal outcome in patients with diabetic kidney disease (DKD). However, a noninvasive biomarker for IFTA is currently lacking. The purpose of this study was to identify urinary markers of IFTA and to determine their clinical relevance as predictors of renal prognosis. METHODS: Seventy patients wi…	2021-01-25	2023-01-19 08:50:22	2023-01-19 08:50:22		295-305		2	36		Nephrol Dial Transplant								eng					PubMed		PMID: 31598726		; C:\Users\loren\Zotero\storage\ACR8SGRB\Lee et al. - 2021 - Urinary chemokine C-X-C motif ligand 16 and endost.pdf	http://www.ncbi.nlm.nih.gov/pubmed/31598726		Biomarkers; Chemokine CXCL16; CXCL16; Diabetes Mellitus; diabetic kidney disease; Diabetic Nephropathies; endostatin; Endostatins; Female; Fibrosis; Glomerular Filtration Rate; Humans; interstitial fibrosis and tubular atrophy; Kidney Function Tests; Kidney Tubules; Male; Middle Aged; pathologic classification; Prognosis
NI7VW6CC	journalArticle	2020	Wu, Liang; Li, Xiao-Qian; Chang, Dong-Yuan; Zhang, Huifen; Li, Jun-Juan; Wu, Shou-Ling; Zhang, Lu-Xia; Chen, Min; Zhao, Ming-Hui	Associations of urinary epidermal growth factor and monocyte chemotactic protein-1 with kidney involvement in patients with diabetic kidney disease	Nephrology, Dialysis, Transplantation: Official Publication of the European Dialysis and Transplant Association - European Renal Association		1460-2385	10.1093/ndt/gfy314		BACKGROUND: In diabetic kidney disease (DKD), it is important to find biomarkers for predicting initiation and progression of the disease. Besides glomerular damage, kidney tubular injury and inflammation are also involved in the development of DKD. The current study investigated the associations of urinary epidermal growth factor (uEGF), monocyte chemotactic protein-1 (MCP-1) and the uEGF:MCP-1 …	2020-02-01	2023-01-19 08:50:03	2023-01-19 08:50:03		291-297		2	35		Nephrol Dial Transplant								eng					PubMed		PMID: 30357416			http://www.ncbi.nlm.nih.gov/pubmed/30357416		Biomarkers; Chemokine CCL2; Creatinine; Cross-Sectional Studies; diabetic kidney disease; Diabetic Nephropathies; Disease Progression; epidermal growth factor; Epidermal Growth Factor; Female; Glomerular Filtration Rate; Humans; Kidney; Kidney Failure, Chronic; Kidney Function Tests; Male; Middle Aged; monocyte chemotactic pepetide-1
QVA7AAF2	journalArticle	2020	Brondani, Letícia de Almeida; Soares, Ariana Aguiar; Recamonde-Mendoza, Mariana; Dall'Agnol, Angélica; Camargo, Joíza Lins; Monteiro, Karina Mariante; Silveiro, Sandra Pinho	Urinary peptidomics and bioinformatics for the detection of diabetic kidney disease	Scientific Reports		2045-2322	10.1038/s41598-020-58067-7		The aim of this study was to establish a peptidomic profile based on LC-MS/MS and random forest (RF) algorithm to distinguish the urinary peptidomic scenario of type 2 diabetes mellitus (T2DM) patients with different stages of diabetic kidney disease (DKD). Urine from 60 T2DM patients was collected: 22 normal (stage A1), 18 moderately increased (stage A2) and 20 severely increased (stage A3) albu…	2020-01-27	2023-01-19 08:49:51	2023-01-19 08:49:51		1242		1	10		Sci Rep								eng					PubMed		PMID: 31988353 PMCID: PMC6985249		; C:\Users\loren\Zotero\storage\3JGPP34D\Brondani et al. - 2020 - Urinary peptidomics and bioinformatics for the det.pdf	http://www.ncbi.nlm.nih.gov/pubmed/31988353		Aged; Algorithms; Biomarkers; Chromatography, Liquid; Computational Biology; Diabetic Nephropathies; Female; Humans; Male; Middle Aged; Peptides; Proteome; Tandem Mass Spectrometry; Urine
J4UCBNG4	journalArticle	2020	Ahn, Hee-Sung; Kim, Jong Ho; Jeong, Hwangkyo; Yu, Jiyoung; Yeom, Jeonghun; Song, Sang Heon; Kim, Sang Soo; Kim, In Joo; Kim, Kyunggon	Differential Urinary Proteome Analysis for Predicting Prognosis in Type 2 Diabetes Patients with and without Renal Dysfunction	International Journal of Molecular Sciences		1422-0067	10.3390/ijms21124236		Renal dysfunction, a major complication of type 2 diabetes, can be predicted from estimated glomerular filtration rate (eGFR) and protein markers such as albumin concentration. Urinary protein biomarkers may be used to monitor or predict patient status. Urine samples were selected from patients enrolled in the retrospective diabetic kidney disease (DKD) study, including 35 with good and 19 with p…	2020-06-14	2023-01-19 08:49:39	2023-01-19 08:49:39		4236		12	21		Int J Mol Sci								eng					PubMed		PMID: 32545899 PMCID: PMC7352871		; C:\Users\loren\Zotero\storage\U6UPKFSQ\Ahn et al. - 2020 - Differential Urinary Proteome Analysis for Predict.pdf	http://www.ncbi.nlm.nih.gov/pubmed/32545899		Acid Phosphatase; Adult; Aged; Biomarkers; Calcium-Binding Proteins; Case-Control Studies; Cathepsin A; Chromatography, Liquid; Diabetes Mellitus, Type 2; diabetic kidney disease; Diabetic Nephropathies; Extracellular Matrix Proteins; Female; G(M2) Activator Protein; Humans; kidney function; machine learning; Male; mass spectrometry; Mass Spectrometry; Middle Aged; Mucin-1; Prognosis; proteomics;…
2ZC5WI56	journalArticle	2020	Doykov, Ivan D.; Heywood, Wendy E.; Nikolaenko, Valeria; Śpiewak, Justyna; Hällqvist, Jenny; Clayton, Peter Theodore; Mills, Philippa; Warnock, David G.; Nowak, Albina; Mills, Kevin	Rapid, proteomic urine assay for monitoring progressive organ disease in Fabry disease	Journal of Medical Genetics		1468-6244	10.1136/jmedgenet-2019-106030		BACKGROUND: Fabry disease is a progressive multisystemic disease, which affects the kidney and cardiovascular systems. Various treatments exist but decisions on how and when to treat are contentious. The current marker for monitoring treatment is plasma globotriaosylsphingosine (lyso-Gb3), but it is not informative about the underlying and developing disease pathology. METHODS: We have created a …	2020-01	2023-01-19 08:49:32	2023-01-19 08:49:32		38-47		1	57		J Med Genet								eng					PubMed		PMID: 31519711		C:\Users\loren\Zotero\storage\65IE4C8B\Doykov et al. - 2020 - Rapid, proteomic urine assay for monitoring progre.pdf;	http://www.ncbi.nlm.nih.gov/pubmed/31519711		biomarker; Biomarkers; Chromatography, Liquid; Fabry disease; Fabry Disease; Female; Glycolipids; Humans; Male; mass spectrometry; proteomics; Proteomics; Sphingolipids; stratify; Tandem Mass Spectrometry; Urine
869AJ2AC	journalArticle	2020	Gohda, Tomohito; Kamei, Nozomu; Koshida, Takeo; Kubota, Mitsunobu; Tanaka, Kanako; Yamashita, Yoshinori; Adachi, Eri; Ichikawa, Saki; Murakoshi, Maki; Ueda, Seiji; Suzuki, Yusuke	Circulating kidney injury molecule-1 as a biomarker of renal parameters in diabetic kidney disease	Journal of Diabetes Investigation		2040-1124	10.1111/jdi.13139		AIMS/INTRODUCTION: Urinary kidney injury molecule-1 (KIM-1) has been associated with proximal tubular damage in human and animal studies. Although it has been recognized as a biomarker of acute kidney injury and chronic kidney disease, its significance in the serum remains unclear. Therefore, we examined the relationship of serum and urinary KIM-1 levels with renal parameters in patients with typ…	2020-03	2023-01-19 08:48:58	2023-01-19 08:48:58		435-440		2	11		J Diabetes Investig								eng					PubMed		PMID: 31483944 PMCID: PMC7078097		; C:\Users\loren\Zotero\storage\7TLBP6HI\Gohda et al. - 2020 - Circulating kidney injury molecule-1 as a biomarke.pdf	http://www.ncbi.nlm.nih.gov/pubmed/31483944		Aged; Biomarker; Biomarkers; Cross-Sectional Studies; Diabetes Mellitus, Type 2; Diabetic kidney disease; Diabetic Nephropathies; Female; Glomerular Filtration Rate; Hepatitis A Virus Cellular Receptor 1; Humans; Kidney Function Tests; Kidney injury molecule-1; Male; Middle Aged; Severity of Illness Index
55BZBMY9	journalArticle	2020	Duan, Suyan; Chen, Jiajia; Wu, Lin; Nie, Guangyan; Sun, Lianqin; Zhang, Chengning; Huang, Zhimin; Xing, Changying; Zhang, Bo; Yuan, Yanggang	Assessment of urinary NGAL for differential diagnosis and progression of diabetic kidney disease	Journal of Diabetes and Its Complications		1873-460X	10.1016/j.jdiacomp.2020.107665		OBJECTIVE: Chronic kidney disease (CKD) related to diabetes has become more common than glomerulonephritis in recent years. Given the inefficient and difficult identification of diabetic kidney disease (DKD) from non-diabetic kidney disease (NDKD) as well as a result of emerging evidence supporting a role for tubular involvement in DKD, we aimed to investigate the utility of urinary neutrophil ge…	2020-10	2023-01-19 08:48:54	2023-01-19 08:48:54		107665		10	34		J Diabetes Complications								eng					PubMed		PMID: 32653382			http://www.ncbi.nlm.nih.gov/pubmed/32653382		Adult; Aged; Diabetes Mellitus, Type 2; Diabetic kidney disease (DKD); Diabetic Nephropathies; Diagnosis, Differential; Disease Progression; Female; Humans; Lipocalin-2; Logistic Models; Male; Middle Aged; Non-diabetic kidney disease (NDKD); Predictive Value of Tests; Proteinuria; Renal Insufficiency, Chronic; Retrospective Studies; Risk Factors; ROC Curve; Urinary neutrophil gelatinase-associate…
J76FG9C6	journalArticle	2019	Schunk, Stefan J.; Zarbock, Alexander; Meersch, Melanie; Küllmar, Mira; Kellum, John A.; Schmit, David; Wagner, Martina; Triem, Sarah; Wagenpfeil, Stefan; Gröne, Hermann-Josef; Schäfers, Hans-Joachim; Fliser, Danilo; Speer, Thimoteus; Zewinger, Stephen	Association between urinary dickkopf-3, acute kidney injury, and subsequent loss of kidney function in patients undergoing cardiac surgery: an observational cohort study	Lancet (London, England)		1474-547X	10.1016/S0140-6736(19)30769-X		BACKGROUND: Cardiac surgery is associated with a high risk of postoperative acute kidney injury (AKI) and subsequent loss of kidney function. We explored the clinical utility of urinary dickkopf-3 (DKK3), a renal tubular stress marker, for preoperative identification of patients at risk for AKI and subsequent kidney function loss. METHODS: This observational cohort study included patients who had…	2019-08-10	2023-01-19 08:48:48	2023-01-19 08:48:48		488-496		10197	394		Lancet	Association between urinary dickkopf-3, acute kidney injury, and subsequent loss of kidney function in patients undergoing cardiac surgery							eng					PubMed		PMID: 31202596			http://www.ncbi.nlm.nih.gov/pubmed/31202596		Acute Kidney Injury; Adaptor Proteins, Signal Transducing; Aged; Aged, 80 and over; Biomarkers; Cardiac Surgical Procedures; Chemokines; Creatinine; Elective Surgical Procedures; Female; Glomerular Filtration Rate; Humans; Intercellular Signaling Peptides and Proteins; Male; Middle Aged; Postoperative Complications; Prospective Studies
A5R2YBF7	journalArticle	2019	Li, Aimei; Yi, Bin; Liu, Yan; Wang, Jianwen; Dai, Qing; Huang, Yuxi; Li, Yan Chun; Zhang, Hao	Urinary NGAL and RBP Are Biomarkers of Normoalbuminuric Renal Insufficiency in Type 2 Diabetes Mellitus	Journal of Immunology Research		2314-7156	10.1155/2019/5063089		OBJECTIVES: As a screening index of diabetic kidney disease (DKD), urinary albumin/creatine ratio (UACR) is commonly used. However, approximately 23.3%-56.6% of DKD patients with estimated glomerular filtration rate (eGFR) < 60 ml/min per 1.73 m2 are normoalbuminuric. Thus, urinary biomarkers of nonalbuminuric renal insufficiency in type 2 diabetes mellitus (T2DM) patients are urgently needed. ME…	2019	2023-01-19 08:47:34	2023-01-19 08:47:34		5063089			2019		J Immunol Res								eng					PubMed		PMID: 31637265 PMCID: PMC6766169		; C:\Users\loren\Zotero\storage\9W8VHI3D\Li et al. - 2019 - Urinary NGAL and RBP Are Biomarkers of Normoalbumi.pdf	http://www.ncbi.nlm.nih.gov/pubmed/31637265		Aged; Albuminuria; Biomarkers; Diabetes Mellitus, Type 2; Diabetic Nephropathies; Female; Humans; Lipocalin-2; Male; Middle Aged; Renal Insufficiency; Retinol-Binding Proteins
KWIQGR53	journalArticle	2019	Satirapoj, Bancha; Pooluea, Pimanong; Nata, Naowanit; Supasyndh, Ouppatham	Urinary biomarkers of tubular injury to predict renal progression and end stage renal disease in type 2 diabetes mellitus with advanced nephropathy: A prospective cohort study	Journal of Diabetes and Its Complications		1873-460X	10.1016/j.jdiacomp.2019.05.013		BACKGROUND: Novel potential tubular biomarkers in diabetic nephropathy could improve risk stratification and prediction. The study aimed to evaluate the association of tubular damage markers with rapid renal progression and incidence of end stage renal disease (ESRD) in type 2 diabetes (T2DM). METHODS: A prospective cohort study, involving a total of 257 patients with T2DM, was included. The base…	2019-09	2023-01-19 08:47:29	2023-01-19 08:47:29		675-681		9	33		J Diabetes Complications	Urinary biomarkers of tubular injury to predict renal progression and end stage renal disease in type 2 diabetes mellitus with advanced nephropathy							eng					PubMed		PMID: 31227289			http://www.ncbi.nlm.nih.gov/pubmed/31227289		Aged; Albuminuria; Angiotensinogen; Biomarkers; Cohort Studies; Cystatin C; Diabetes Mellitus, Type 2; Diabetic Nephropathies; Diabetic nephropathy; Disease Progression; Female; Glomerular Filtration Rate; Hepatitis A Virus Cellular Receptor 1; Humans; Kidney Failure, Chronic; Kidney Tubules; Lipocalin-2; Male; Middle Aged; Prospective Studies; Sensitivity and Specificity; Urine angiotensinogen; …
KFFBSC6Z	journalArticle	2019	Pilemann-Lyberg, Sascha; Rasmussen, Daniel Guldager Kring; Hansen, Tine Willum; Tofte, Nete; Winther, Signe Abitz; Holm Nielsen, Signe; Theilade, Simone; Karsdal, Morten Asser; Genovese, Federica; Rossing, Peter	Markers of Collagen Formation and Degradation Reflect Renal Function and Predict Adverse Outcomes in Patients With Type 1 Diabetes	Diabetes Care		1935-5548	10.2337/dc18-2599		OBJECTIVE: Patients with type 1 diabetes (T1D) have a higher risk of developing chronic kidney disease, cardiovascular events (CVEs), and mortality than the general population. We hypothesized that two previously published biomarkers, namely PRO-C6, a biomarker of collagen type VI formation, and C3M, a biomarker of collagen type III degradation, may be associated with impaired renal function and …	2019-09	2023-01-19 08:44:56	2023-01-19 08:44:56		1760-1768		9	42		Diabetes Care								eng					PubMed		PMID: 31262950			http://www.ncbi.nlm.nih.gov/pubmed/31262950		Aged; Biomarkers; Collagen Type III; Collagen Type VI; Diabetes Mellitus, Type 1; Diabetic Cardiomyopathies; Diabetic Nephropathies; Female; Glomerular Filtration Rate; Heart Failure; Humans; Kidney; Kidney Failure, Chronic; Male; Middle Aged; Procollagen; Prognosis; Proportional Hazards Models; Risk Factors
NMMPP5Y4	journalArticle	2018	Zewinger, Stephen; Rauen, Thomas; Rudnicki, Michael; Federico, Giuseppina; Wagner, Martina; Triem, Sarah; Schunk, Stefan J.; Petrakis, Ioannis; Schmit, David; Wagenpfeil, Stefan; Heine, Gunnar H.; Mayer, Gert; Floege, Jürgen; Fliser, Danilo; Gröne, Hermann-Josef; Speer, Thimoteus	Dickkopf-3 (DKK3) in Urine Identifies Patients with Short-Term Risk of eGFR Loss	Journal of the American Society of Nephrology: JASN		1533-3450	10.1681/ASN.2018040405		BACKGROUND: The individual course of CKD may vary, and improved methods for identifying which patients will experience short-term eGFR loss are needed. Assessing urinary Dickkopf-3 (DKK3), a stress-induced tubular epithelia-derived profibrotic glycoprotein, may provide information about ongoing tubulointerstitial fibrosis and short-term eGFR loss. METHODS: To investigate urinary DKK3's potential …	2018-11	2023-01-18 21:34:17	2023-01-18 21:34:17		2722-2733		11	29		J Am Soc Nephrol								eng					PubMed		PMID: 30279273 PMCID: PMC6218861		; C:\Users\loren\Zotero\storage\VL7AHC5E\Zewinger et al. - 2018 - Dickkopf-3 (DKK3) in Urine Identifies Patients wit.pdf	http://www.ncbi.nlm.nih.gov/pubmed/30279273		Adaptor Proteins, Signal Transducing; Adult; Aged; Aged, 80 and over; Albuminuria; Biomarkers; Chemokines; chronic kidney disease; clinical nephrology; Cohort Studies; Creatinine; Disease Progression; Female; Glomerular Filtration Rate; Glomerulonephritis, IGA; Humans; IgA nephropathy; Intercellular Signaling Peptides and Proteins; interstitial fibrosis; Kidney; Male; Middle Aged; progression of …
4UT8EJZ3	journalArticle	2018	Żyłka, Agnieszka; Dumnicka, Paulina; Kuśnierz-Cabala, Beata; Gala-Błądzińska, Agnieszka; Ceranowicz, Piotr; Kucharz, Jakub; Ząbek-Adamska, Anna; Maziarz, Barbara; Drożdż, Ryszard; Kuźniewski, Marek	Markers of Glomerular and Tubular Damage in the Early Stage of Kidney Disease in Type 2 Diabetic Patients	Mediators of Inflammation		1466-1861	10.1155/2018/7659243		Diabetic kidney disease develops in half of genetically predisposed patients with type 2 diabetes (T2DM). Early diagnosis of kidney damage and nephroprotective treatment are the ways of preventing the disease progression. Our aim was to evaluate selected laboratory markers of glomerular and tubular damage in T2DM patients with early stages of chronic kidney disease (G1/G2, A1/A2) for their associ…	2018	2023-01-18 21:34:05	2023-01-18 21:34:05		7659243			2018		Mediators Inflamm								eng					PubMed		PMID: 30158836 PMCID: PMC6109534		; C:\Users\loren\Zotero\storage\IQHUB4SK\Żyłka et al. - 2018 - Markers of Glomerular and Tubular Damage in the Ea.pdf	http://www.ncbi.nlm.nih.gov/pubmed/30158836		Albuminuria; Biomarkers; Creatinine; Cross-Sectional Studies; Cystatin C; Diabetes Mellitus, Type 2; Diabetic Nephropathies; Hepatitis A Virus Cellular Receptor 1; Humans; Immunoglobulin G; Lipocalin-2; Retrospective Studies; Transferrin; Uromodulin
GWF9FBMF	journalArticle	2018	Satirapoj, Bancha; Dispan, Rattanawan; Radinahamed, Piyanuch; Kitiyakara, Chagriya	Urinary epidermal growth factor, monocyte chemoattractant protein-1 or their ratio as predictors for rapid loss of renal function in type 2 diabetic patients with diabetic kidney disease	BMC nephrology		1471-2369	10.1186/s12882-018-1043-x		BACKGROUND: Increased monocyte chemoattractant protein-1 (MCP-1) and decreased epidermal growth factor (EGF) are promising biomarkers to predict progressive decline in kidney function in non-diabetic kidney diseases. We aimed to evaluate the performance of urinary EGF, MCP-1 or their ratio in predicting rapid decline of GFR in a cohort of Type 2 diabetic patients (T2DM) with diabetic kidney disea…	2018-09-21	2023-01-18 21:34:00	2023-01-18 21:34:00		246		1	19		BMC Nephrol								eng					PubMed		PMID: 30241508 PMCID: PMC6150979		; C:\Users\loren\Zotero\storage\SMVUM9EU\Satirapoj et al. - 2018 - Urinary epidermal growth factor, monocyte chemoatt.pdf	http://www.ncbi.nlm.nih.gov/pubmed/30241508		Aged; Albuminuria; Biomarker; Biomarkers; Cardiovascular Diseases; Chemokine CCL2; Creatinine; Diabetes Mellitus, Type 2; Diabetic Angiopathies; Diabetic Nephropathies; Diabetic nephropathy; Disease Progression; Epidermal Growth Factor; Epidermal growth factor (EGF); kidney; cytokine; Female; Glomerular Filtration Rate; Humans; Male; Middle Aged; Monocyte chemoattractant protein-1 (MCP-1); Prospe…
SARUB7S3	journalArticle	2018	Liao, Wen-Ling; Chang, Chiz-Tzung; Chen, Ching-Chu; Lee, Wen-Jane; Lin, Shih-Yi; Liao, Hsin-Yi; Wu, Chia-Ming; Chang, Ya-Wen; Chen, Chao-Jung; Tsai, Fuu-Jen	Urinary Proteomics for the Early Diagnosis of Diabetic Nephropathy in Taiwanese Patients	Journal of Clinical Medicine		2077-0383	10.3390/jcm7120483		Diabetic nephropathy (DN) is a major complication in diabetic patients. Microalbuminuria testing is used to identify renal disease; however, its predictive value is questionable. We aimed to identify urinary biomarkers to early diagnosis nephropathy before identifiable alternations in kidney function or urine albumin excretion occurs. Proteomic approaches were used to identify potential urinary b…	2018-11-26	2023-01-18 21:33:42	2023-01-18 21:33:42		483		12	7		J Clin Med								eng					PubMed		PMID: 30486327 PMCID: PMC6306863		; C:\Users\loren\Zotero\storage\LWXDZ32J\Liao et al. - 2018 - Urinary Proteomics for the Early Diagnosis of Diab.pdf	http://www.ncbi.nlm.nih.gov/pubmed/30486327		early prediction; nephropathy; proteomics
DW45EQSR	journalArticle	2018	Li, Baihong; Zhang, Yanqin; Wang, Fang; Nair, Viji; Ding, Fangrui; Xiao, Huijie; Yao, Yong; Kretzler, Matthias; Ju, Wenjun; Ding, Jie	Urinary epidermal growth factor as a prognostic marker for the progression of Alport syndrome in children	Pediatric Nephrology (Berlin, Germany)		1432-198X	10.1007/s00467-018-3988-1		BACKGROUND: Alport syndrome is a rare hereditary kidney disease manifested with progressive renal failure. Considerable variation exists in terms of disease progression among patients with Alport syndrome. Identification of patients at high risk of rapid progression remains an unmet need. Urinary epidermal growth factor (uEGF) has been shown to be independently associated with risk of progression…	2018-10	2023-01-18 21:33:36	2023-01-18 21:33:36		1731-1739		10	33		Pediatr Nephrol								eng					PubMed		PMID: 29948307 PMCID: PMC6132884		; C:\Users\loren\Zotero\storage\74ML2DG3\Li et al. - 2018 - Urinary epidermal growth factor as a prognostic ma.pdf	http://www.ncbi.nlm.nih.gov/pubmed/29948307		Adolescent; Age Factors; Alport syndrome; Biomarkers; Case-Control Studies; Child; Child, Preschool; Creatinine; Disease Progression; Epidermal Growth Factor; Female; Follow-Up Studies; Glomerular Filtration Rate; Humans; Kidney Failure, Chronic; Kidney Function Tests; Male; Nephritis, Hereditary; Prognosis; Prognostic marker; Progression; Risk Assessment; Severity of Illness Index; Urinary epide…
SPUXAECV	journalArticle	2018	Critselis, Elena; Vlahou, Antonia; Stel, Vianda S.; Morton, Rachael L.	Cost-effectiveness of screening type 2 diabetes patients for chronic kidney disease progression with the CKD273 urinary peptide classifier as compared to urinary albumin excretion	Nephrology, Dialysis, Transplantation: Official Publication of the European Dialysis and Transplant Association - European Renal Association		1460-2385	10.1093/ndt/gfx068		BACKGROUND: In type 2 diabetes mellitus (T2DM) patients, chronic kidney disease (CKD) progression may occur without detectable changes in urinary albumin excretion (UAE) rate. A new urinary peptide classifier (CKD273) has exhibited greater ability to detect CKD progression, however, its cost-effectiveness remains unknown. This study evaluated the cost-effectiveness of screening for CKD progressio…	2018-03-01	2023-01-18 21:32:57	2023-01-18 21:32:57		441-449		3	33		Nephrol Dial Transplant								eng					PubMed		PMID: 29106632		; C:\Users\loren\Zotero\storage\6EWKQXGU\Critselis et al. - 2018 - Cost-effectiveness of screening type 2 diabetes pa.pdf	http://www.ncbi.nlm.nih.gov/pubmed/29106632		Albumins; Biomarkers; Cohort Studies; Cost-Benefit Analysis; Diabetes Mellitus, Type 2; Diabetic Nephropathies; Disease Progression; Female; Humans; Male; Mass Screening; Middle Aged; Peptide Fragments; Quality-Adjusted Life Years; Risk Factors
IERNU4DT	journalArticle	2018	Caterino, Marianna; Zacchia, Miriam; Costanzo, Michele; Bruno, Giuliana; Arcaniolo, Davide; Trepiccione, Francesco; Siciliano, Rosa Anna; Mazzeo, Maria Fiorella; Ruoppolo, Margherita; Capasso, Giovambattista	Urine Proteomics Revealed a Significant Correlation Between Urine-Fibronectin Abundance and Estimated-GFR Decline in Patients with Bardet-Biedl Syndrome	Kidney & Blood Pressure Research		1423-0143	10.1159/000488096		BACKGROUND: /Aims: Renal disease is a common cause of morbidity in patients with Bardet-Biedl syndrome (BBS), however the severity of kidney dysfunction is highly variable. To date, there is little information on the pathogenesis, the risk and predictor factors for poor renal outcome in this setting. The present study aims to analyze the spectrum of urinary proteins in BBS patients, in order to p…	2018	2023-01-18 21:32:51	2023-01-18 21:32:51		389-405		2	43		Kidney Blood Press Res								eng					PubMed		PMID: 29539623		; C:\Users\loren\Zotero\storage\CA9FISPD\Caterino et al. - 2018 - Urine Proteomics Revealed a Significant Correlatio.pdf	http://www.ncbi.nlm.nih.gov/pubmed/29539623		Adult; Bardet-Biedl Syndrome; Biomarkers; Case-Control Studies; Female; Fibronectin; Fibronectins; Fibrosis; GFR decline; Glomerular Filtration Rate; Humans; Kidney dysfunction; Male; Middle Aged; Proteome; Proteomics; Urine; Urine proteome; Young Adult
C6VHAUNW	journalArticle	2017	Yang, Xiaobing; Chen, Chunbo; Teng, Siyuan; Fu, Xiaorui; Zha, Yan; Liu, Huafeng; Wang, Li; Tian, Jianwei; Zhang, Xiangyan; Liu, Youhua; Nie, Jing; Hou, Fan Fan	Urinary Matrix Metalloproteinase-7 Predicts Severe AKI and Poor Outcomes after Cardiac Surgery	Journal of the American Society of Nephrology: JASN		1533-3450	10.1681/ASN.2017020142		Urinary matrix metalloproteinase-7 (uMMP-7) levels consistently reflect the activity of intrarenal Wnt/β-catenin, which is activated in AKI models. To test the hypothesis that uMMP-7 is a predictor for severe AKI in patients after cardiac surgery, we performed a prospective, multicenter, two-stage cohort study in 721 patients undergoing cardiac surgery. In stage 1, we enrolled 323 children from t…	2017-11	2023-01-18 21:32:37	2023-01-18 21:32:37		3373-3382		11	28		J Am Soc Nephrol								eng					PubMed		PMID: 28698269 PMCID: PMC5661292			http://www.ncbi.nlm.nih.gov/pubmed/28698269		Acute Kidney Injury; Adolescent; Adult; Biomarker; Cardiac Surgery; Cardiac Surgical Procedures; Child; Child, Preschool; Female; Humans; Infant; Male; Matrix Metalloproteinase 7; Matrix Metalloproteinase-7; Middle Aged; Predictive Value of Tests; Prospective Studies; Severity of Illness Index; Treatment Outcome
CWRINXYM	journalArticle	2017	Dong, Liqun; Ma, Qing; Bennett, Michael; Devarajan, Prasad	Urinary biomarkers of cell cycle arrest are delayed predictors of acute kidney injury after pediatric cardiopulmonary bypass	Pediatric Nephrology (Berlin, Germany)		1432-198X	10.1007/s00467-017-3748-7		BACKGROUND: Several novel biomarkers that predict acute kidney injury (AKI) have recently been proposed. We have evaluated the sequential patterns of biomarker elevation after pediatric cardiopulmonary bypass (CPB) and determined their diagnostic accuracy. METHODS: We measured the ability of neutrophil gelatinase-associated lipocalin (NGAL), interleukin-18 (IL-18), liver type fatty-acid binding p…	2017-12	2023-01-18 21:32:32	2023-01-18 21:32:32		2351-2360		12	32		Pediatr Nephrol								eng					PubMed		PMID: 28755073 PMCID: PMC7441589		C:\Users\loren\Zotero\storage\2Y42MJ9Y\Dong et al. - 2017 - Urinary biomarkers of cell cycle arrest are delaye.pdf;	http://www.ncbi.nlm.nih.gov/pubmed/28755073		Acute kidney injury; Acute Kidney Injury; Acute renal failure; Area Under Curve; Biomarkers; Cardiac surgery; Cardiopulmonary Bypass; Case-Control Studies; Cell Cycle Checkpoints; Child; Child, Preschool; Creatinine; Enzyme-Linked Immunosorbent Assay; Fatty Acid-Binding Proteins; Female; Hepatitis A Virus Cellular Receptor 1; Humans; Infant; Insulin-Like Growth Factor Binding Proteins; Interleuki…
D9YNEBAI	journalArticle	2017	Rasmussen, Daniel Guldager Kring; Fenton, Anthony; Jesky, Mark; Ferro, Charles; Boor, Peter; Tepel, Martin; Karsdal, Morten Asser; Genovese, Federica; Cockwell, Paul	Urinary endotrophin predicts disease progression in patients with chronic kidney disease	Scientific Reports		2045-2322	10.1038/s41598-017-17470-3		Renal fibrosis is the central pathogenic process in progression of chronic kidney disease (CKD). Collagen type VI (COL VI) is upregulated in renal fibrosis. Endotrophin is released from COL VI and promotes pleiotropic pro-fibrotic effects. Kidney disease severity varies considerably and accurate information regarding CKD progression may improve clinical decisions. We tested the hypothesis that ur…	2017-12-11	2023-01-18 21:32:28	2023-01-18 21:32:28		17328		1	7		Sci Rep								eng					PubMed		PMID: 29229941 PMCID: PMC5725589		; C:\Users\loren\Zotero\storage\SDWC4HFJ\Rasmussen et al. - 2017 - Urinary endotrophin predicts disease progression i.pdf	http://www.ncbi.nlm.nih.gov/pubmed/29229941		Aged; Biomarkers; Collagen Type VI; Creatinine; Disease Progression; Female; Follow-Up Studies; Glomerular Filtration Rate; Humans; Kidney Function Tests; Male; Middle Aged; Peptide Fragments; Prognosis; Prospective Studies; Renal Insufficiency, Chronic; Risk Factors
HH6ANWU2	journalArticle	2021	Verbeke, Francis; Siwy, Justyna; Van Biesen, Wim; Mischak, Harald; Pletinck, Anneleen; Schepers, Eva; Neirynck, Nathalie; Magalhães, Pedro; Pejchinovski, Martin; Pontillo, Claudia; Lichtinghagen, Ralf; Brand, Korbinian; Vlahou, Antonia; De Bacquer, Dirk; Glorieux, Griet	The urinary proteomics classifier chronic kidney disease 273 predicts cardiovascular outcome in patients with chronic kidney disease	Nephrology, Dialysis, Transplantation: Official Publication of the European Dialysis and Transplant Association - European Renal Association		1460-2385	10.1093/ndt/gfz242		BACKGROUND: The urinary proteomic classifier chronic kidney disease 273 (CKD273) is predictive for the development and progression of chronic kidney disease (CKD) and/or albuminuria in type 2 diabetes. This study evaluates its role in the prediction of cardiovascular (CV) events in patients with CKD Stages G1-G5. METHODS: We applied the CKD273 classifier in a cohort of 451 patients with CKD Stage…	2021-04-26	2023-01-18 21:32:17	2023-01-18 21:32:17		811-818		5	36		Nephrol Dial Transplant								eng					PubMed		PMID: 31837226		; C:\Users\loren\Zotero\storage\YRTEEG2N\Verbeke et al. - 2021 - The urinary proteomics classifier chronic kidney d.pdf	http://www.ncbi.nlm.nih.gov/pubmed/31837226		Adult; Aged; Albuminuria; Cardiovascular Diseases; cardiovascular risk; chronic kidney disease; CKD273; Cohort Studies; Diabetes Mellitus, Type 2; Humans; Male; Middle Aged; mortality; proteomics; Proteomics; Renal Insufficiency, Chronic
DIWJ9ITM	journalArticle	2017	Siwy, Justyna; Zürbig, Petra; Argiles, Angel; Beige, Joachim; Haubitz, Marion; Jankowski, Joachim; Julian, Bruce A.; Linde, Peter G.; Marx, David; Mischak, Harald; Mullen, William; Novak, Jan; Ortiz, Alberto; Persson, Frederik; Pontillo, Claudia; Rossing, Peter; Rupprecht, Harald; Schanstra, Joost P.; Vlahou, Antonia; Vanholder, Raymond	Noninvasive diagnosis of chronic kidney diseases using urinary proteome analysis	Nephrology, Dialysis, Transplantation: Official Publication of the European Dialysis and Transplant Association - European Renal Association		1460-2385	10.1093/ndt/gfw337		BACKGROUND: In spite of its invasive nature and risks, kidney biopsy is currently required for precise diagnosis of many chronic kidney diseases (CKDs). Here, we explored the hypothesis that analysis of the urinary proteome can discriminate different types of CKD irrespective of the underlying mechanism of disease. METHODS: We used data from the proteome analyses of 1180 urine samples from patien…	2017-12-01	2023-01-18 21:31:55	2023-01-18 21:31:55		2079-2089		12	32		Nephrol Dial Transplant								eng					PubMed		PMID: 27984204 PMCID: PMC5837301		; C:\Users\loren\Zotero\storage\ZL56FFKA\Siwy et al. - 2017 - Noninvasive diagnosis of chronic kidney diseases u.pdf	http://www.ncbi.nlm.nih.gov/pubmed/27984204		Adult; Aged; biomarkers; Biomarkers; chronic kidney disease; Female; Humans; Male; Middle Aged; peptides; Proteome; proteome analysis; Proteomics; Renal Insufficiency, Chronic; ROC Curve; Urinalysis; urine
4XA8XFZN	journalArticle	2017	Pontillo, Claudia; Zhang, Zhen-Yu; Schanstra, Joost P.; Jacobs, Lotte; Zürbig, Petra; Thijs, Lutgarde; Ramírez-Torres, Adela; Heerspink, Hiddo J. L.; Lindhardt, Morten; Klein, Ronald; Orchard, Trevor; Porta, Massimo; Bilous, Rudolf W.; Charturvedi, Nishi; Rossing, Peter; Vlahou, Antonia; Schepers, Eva; Glorieux, Griet; Mullen, William; Delles, Christian; Verhamme, Peter; Vanholder, Raymond; Staes…	Prediction of Chronic Kidney Disease Stage 3 by CKD273, a Urinary Proteomic Biomarker	Kidney International Reports		2468-0249	10.1016/j.ekir.2017.06.004		INTRODUCTION: CKD273 is a urinary biomarker, which in advanced chronic kidney disease predicts further deterioration. We investigated whether CKD273 can also predict a decline of estimated glomerular filtration rate (eGFR) to <60 ml/min per 1.73 m2. METHODS: In analyses of 2087 individuals from 6 cohorts (46.4% women; 73.5% with diabetes; mean age, 46.1 years; eGFR ≥ 60 ml/min per 1.73 m2, 100%; …	2017-11	2023-01-18 21:31:41	2023-01-18 21:31:41		1066-1075		6	2		Kidney Int Rep								eng					PubMed		PMID: 29130072 PMCID: PMC5669285		; C:\Users\loren\Zotero\storage\CZWBUSDP\Pontillo et al. - 2017 - Prediction of Chronic Kidney Disease Stage 3 by CK.pdf	http://www.ncbi.nlm.nih.gov/pubmed/29130072		biomarker; chronic kidney disease; clinical science; glomerular filtration rate; peptidomics; proteomics
CCZK9VC3	journalArticle	2022	Petra, Eleni; Siwy, Justyna; Vlahou, Antonia; Jankowski, Joachim	Urine peptidome in combination with transcriptomics analysis highlights MMP7, MMP14 and PCSK5 for further investigation in chronic kidney disease	PloS One		1932-6203	10.1371/journal.pone.0262667		Chronic kidney disease (CKD) is characterized by the loss of kidney function. The molecular mechanisms underlying the development and progression of CKD are still not fully understood. Among others, the urinary peptidome has been extensively studied, with several urinary peptides effectively detecting disease progression. However, their link to proteolytic events has not been made yet. This study…	2022	2023-01-18 21:31:35	2023-01-18 21:31:35		e0262667		1	17		PLoS One								eng					PubMed		PMID: 35045102 PMCID: PMC8769332		; C:\Users\loren\Zotero\storage\L35QNQHL\Petra et al. - 2022 - Urine peptidome in combination with transcriptomic.pdf	http://www.ncbi.nlm.nih.gov/pubmed/35045102		Aged; Biomarkers; Body Fluids; Case-Control Studies; Databases, Factual; Female; Gene Expression; Gene Expression Profiling; Humans; Male; Matrix Metalloproteinase 14; Matrix Metalloproteinase 7; Peptide Hydrolases; Peptides; Proprotein Convertase 5; Renal Insufficiency, Chronic; Transcriptome; Urine
2D4PWNDN	journalArticle	2016	Federico, Giuseppina; Meister, Michael; Mathow, Daniel; Heine, Gunnar H.; Moldenhauer, Gerhard; Popovic, Zoran V.; Nordström, Viola; Kopp-Schneider, Annette; Hielscher, Thomas; Nelson, Peter J.; Schaefer, Franz; Porubsky, Stefan; Fliser, Danilo; Arnold, Bernd; Gröne, Hermann-Josef	Tubular Dickkopf-3 promotes the development of renal atrophy and fibrosis	JCI insight		2379-3708	10.1172/jci.insight.84916		Renal tubular atrophy and interstitial fibrosis are common hallmarks of etiologically different progressive chronic kidney diseases (CKD) that eventually result in organ failure. Even though these pathological manifestations constitute a major public health problem, diagnostic tests, as well as therapeutic options, are currently limited. Members of the dickkopf (DKK) family, DKK1 and -2, have bee…	2016-01-21	2023-03-06 10:41:12	2023-03-06 10:41:12		e84916		1	1		JCI Insight								eng					PubMed		PMID: 27699213 PMCID: PMC5033928		; C:\Users\loren\Zotero\storage\STKJ6SZ2\Federico et al. - 2016 - Tubular Dickkopf-3 promotes the development of ren.pdf	http://www.ncbi.nlm.nih.gov/pubmed/27699213		Adaptor Proteins, Signal Transducing; Animals; Atrophy; Fibrosis; Intercellular Signaling Peptides and Proteins; Kidney; Kidney Diseases; Kidney Tubules; Male; Mice; Mice, Inbred C57BL; Nephritis, Interstitial; Renal Insufficiency, Chronic; Wnt Signaling Pathway
PQLFTUY9	journalArticle	2022	Cortvrindt, Charlotte; Speeckaert, Reinhart; Delanghe, Joris R.; Speeckaert, Marijn M.	Urinary Epidermal Growth Factor: A Promising “Next Generation” Biomarker in Kidney Disease	American Journal of Nephrology		0250-8095, 1421-9670	10.1159/000524586	https://www.karger.com/Article/FullText/524586	<b><i>Background:</i></b> The epidermal growth factor (EGF) is a globular protein that is generated in the kidney, especially in the loop of Henle and the distal convoluted tubule. While EGF is nonexistent or hardly detectable in plasma, it is present in normal people’s urine. Until now, risk stratification and chronic kidney disease (CKD) diagnosis have relied on estimated glomerular filtration …	2022	2023-03-07 09:43:31	2023-03-07 09:43:31	2023-03-07 09:43:31	372-387		5	53		Am J Nephrol	Urinary Epidermal Growth Factor							en					DOI.org (Crossref)				C:\Users\loren\Zotero\storage\I837EFUB\Cortvrindt et al. - 2022 - Urinary Epidermal Growth Factor A Promising “Next.pdf
G23KNTGG	journalArticle	2008	Bolignano, Davide; Donato, Valentina; Coppolino, Giuseppe; Campo, Susanna; Buemi, Antoine; Lacquaniti, Antonio; Buemi, Michele	Neutrophil Gelatinase–Associated Lipocalin (NGAL) as a Marker of Kidney Damage	American Journal of Kidney Diseases		02726386	10.1053/j.ajkd.2008.01.020	https://linkinghub.elsevier.com/retrieve/pii/S0272638608001637		2008-09	2023-03-12 14:05:22	2023-03-12 14:05:22	2023-03-12 14:05:22	595-605		3	52		American Journal of Kidney Diseases								en					DOI.org (Crossref)
WIX3FDU6	journalArticle	2019	Watson, Drew; Yang, Joshua Y. C.; Sarwal, Reuben D.; Sigdel, Tara K.; Liberto, Juliane M.; Damm, Izabella; Louie, Victoria; Sigdel, Shristi; Livingstone, Devon; Soh, Katherine; Chakraborty, Arjun; Liang, Michael; Lin, Pei-Chen; Sarwal, Minnie M.	A Novel Multi-Biomarker Assay for Non-Invasive Quantitative Monitoring of Kidney Injury	Journal of Clinical Medicine		2077-0383	10.3390/jcm8040499	https://www.mdpi.com/2077-0383/8/4/499	The current standard of care measures for kidney function, proteinuria, and serum creatinine (SCr) are poor predictors of early-stage kidney disease. Measures that can detect chronic kidney disease in its earlier stages are needed to enable therapeutic intervention and reduce adverse outcomes of chronic kidney disease. We have developed the Kidney Injury Test (KIT) and a novel KIT Score based on …	2019-04-12	2023-03-14 15:03:49	2023-03-14 15:03:49	2023-03-14 15:03:49	499		4	8		JCM								en					DOI.org (Crossref)				C:\Users\loren\Zotero\storage\JTRZTNGB\Watson et al. - 2019 - A Novel Multi-Biomarker Assay for Non-Invasive Qua.pdf
	journalArticle	2018	Nowak N, Skupien J, Smiles AM, Yamanouchi M, Niewczas MA, Galecki AT, Duffin KL, Breyer MD, Pullen N, Bonventre JV, Krolewski AS	Markers of early progressive renal decline in type 2 diabetes suggest different implications for etiological studies and prognostic tests development	Kidney International			10.1016/j.kint.2017.11.024.												Kidney Int.
[truncated: 37 more columns]
